# Supplementary material
Source: PubMed Central journal article supplement (PMC4270817)
Supplement: NIHMS640494-supplement-Supplemental_Material.pdf [file NIHMS640494-supplement-Supplemental_Material.pdf]

# **Supplement Material**

Supplement I

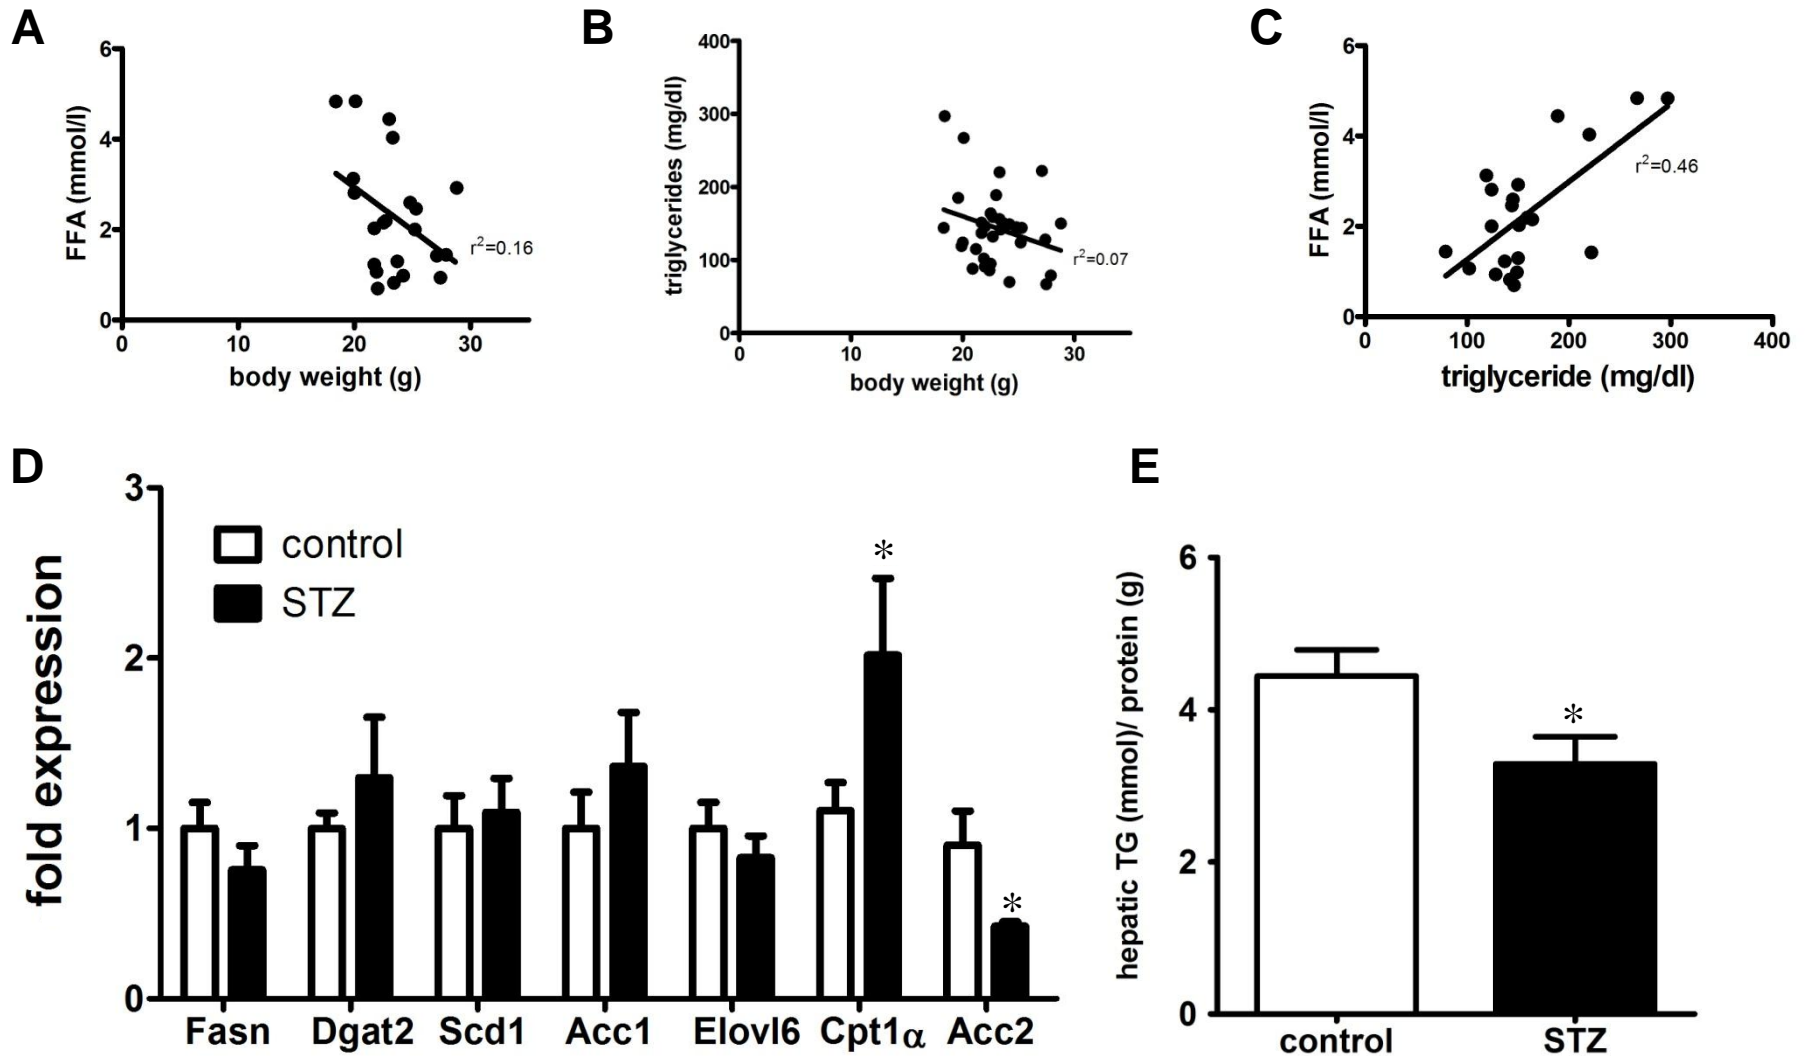

**Supplemental Figure I:** Multivariate analysis comparing (A) FFA and body weight, (B) TG and body weight and (C) TG and FFA. (D) Hepatic gene expression of *Fasn*, *Dgat2*, *Scd1*, *Acc1*, *Elovl6*, *Cpt1 $\alpha$*  and *Acc2* was assessed in mice with 8 weeks of STZ-diabetes using quantitative real-time PCR. Gene expression is expressed relative to fed non-diabetic control mice (n = 5-8/group) (E) TG content in livers of 8 weeks STZ-diabetic mice (n = 5-8/group). \*:  $p \leq 0.05$  vs. control. Results are presented as mean  $\pm$  SEM.

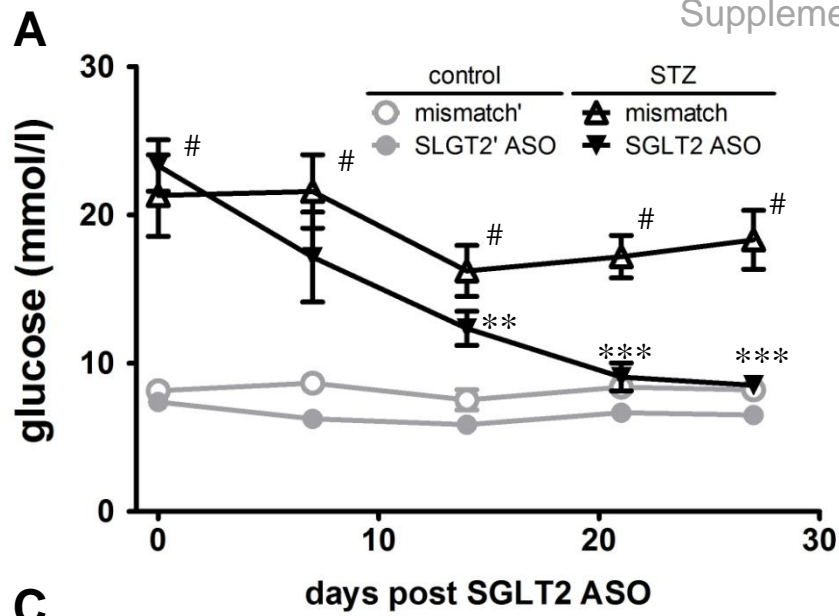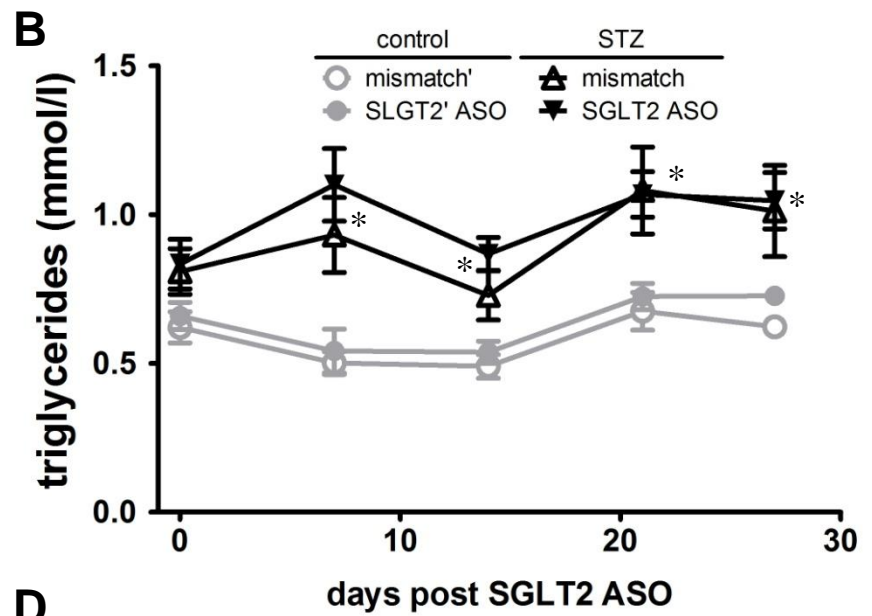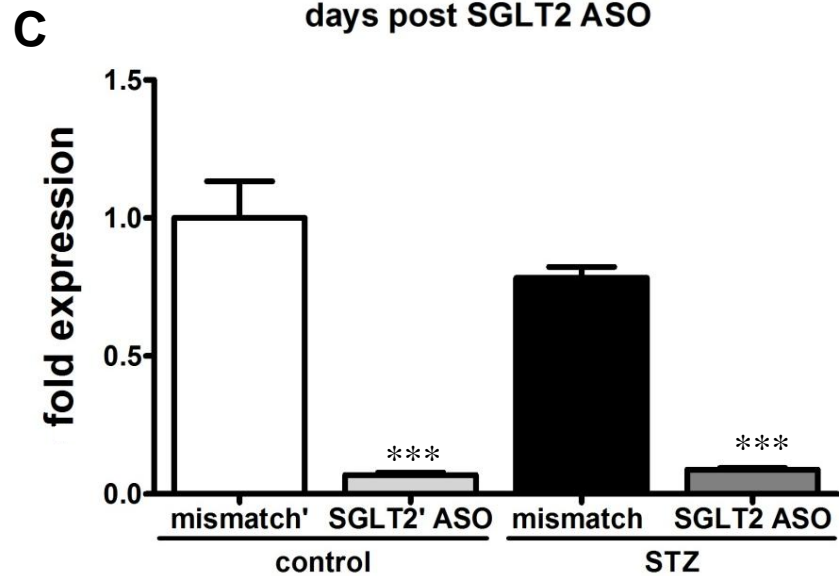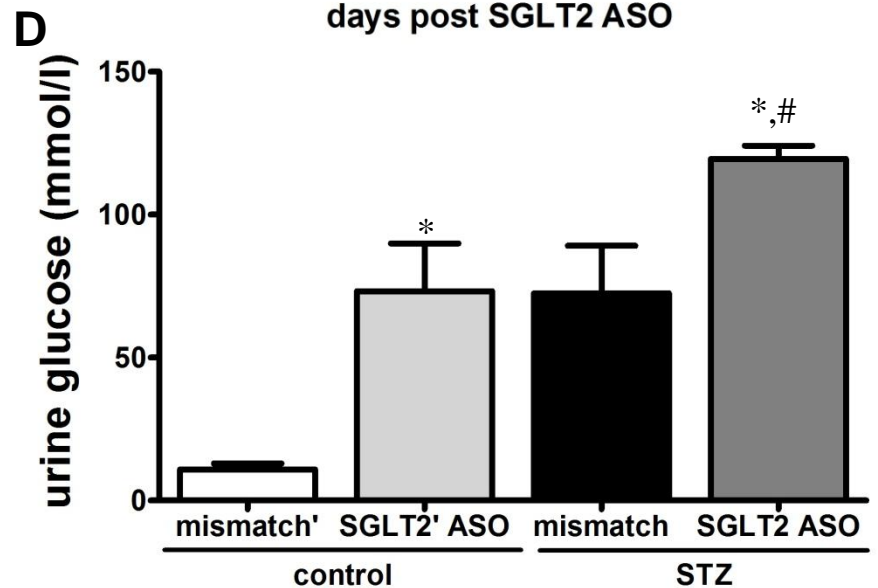

**Supplemental Figure II: Glucose reduction in STZ-diabetic mice by SGLT2-antisense does not reduce plasma TG levels (A)**

Course of 4 hours fasting glucose levels over 28 days. \*\*:  $p \leq 0.01$ , \*\*\*:  $p \leq 0.001$  vs. STZ + mismatch, #:  $p \leq 0.001$  vs. control + mismatch. **(B)** Course of 4 hours fasting TG levels, \*:  $p \leq 0.05$  STZ-diabetic groups vs. respective non-diabetic control groups. **(C)** Gene expression of SGLT2 in the kidney of the different treatment groups, \*\*\*:  $p \leq 0.001$  vs. respective mismatch group. **(D)** Glucose levels in the urine of the different treatment groups. \*:  $p \leq 0.05$  SGLT2-ASO mice vs. respective mismatch mice, #:  $p \leq 0.001$  vs. control + mismatch. ( $n = 5-8$ /group for all panels). Results are presented as mean  $\pm$  SEM.

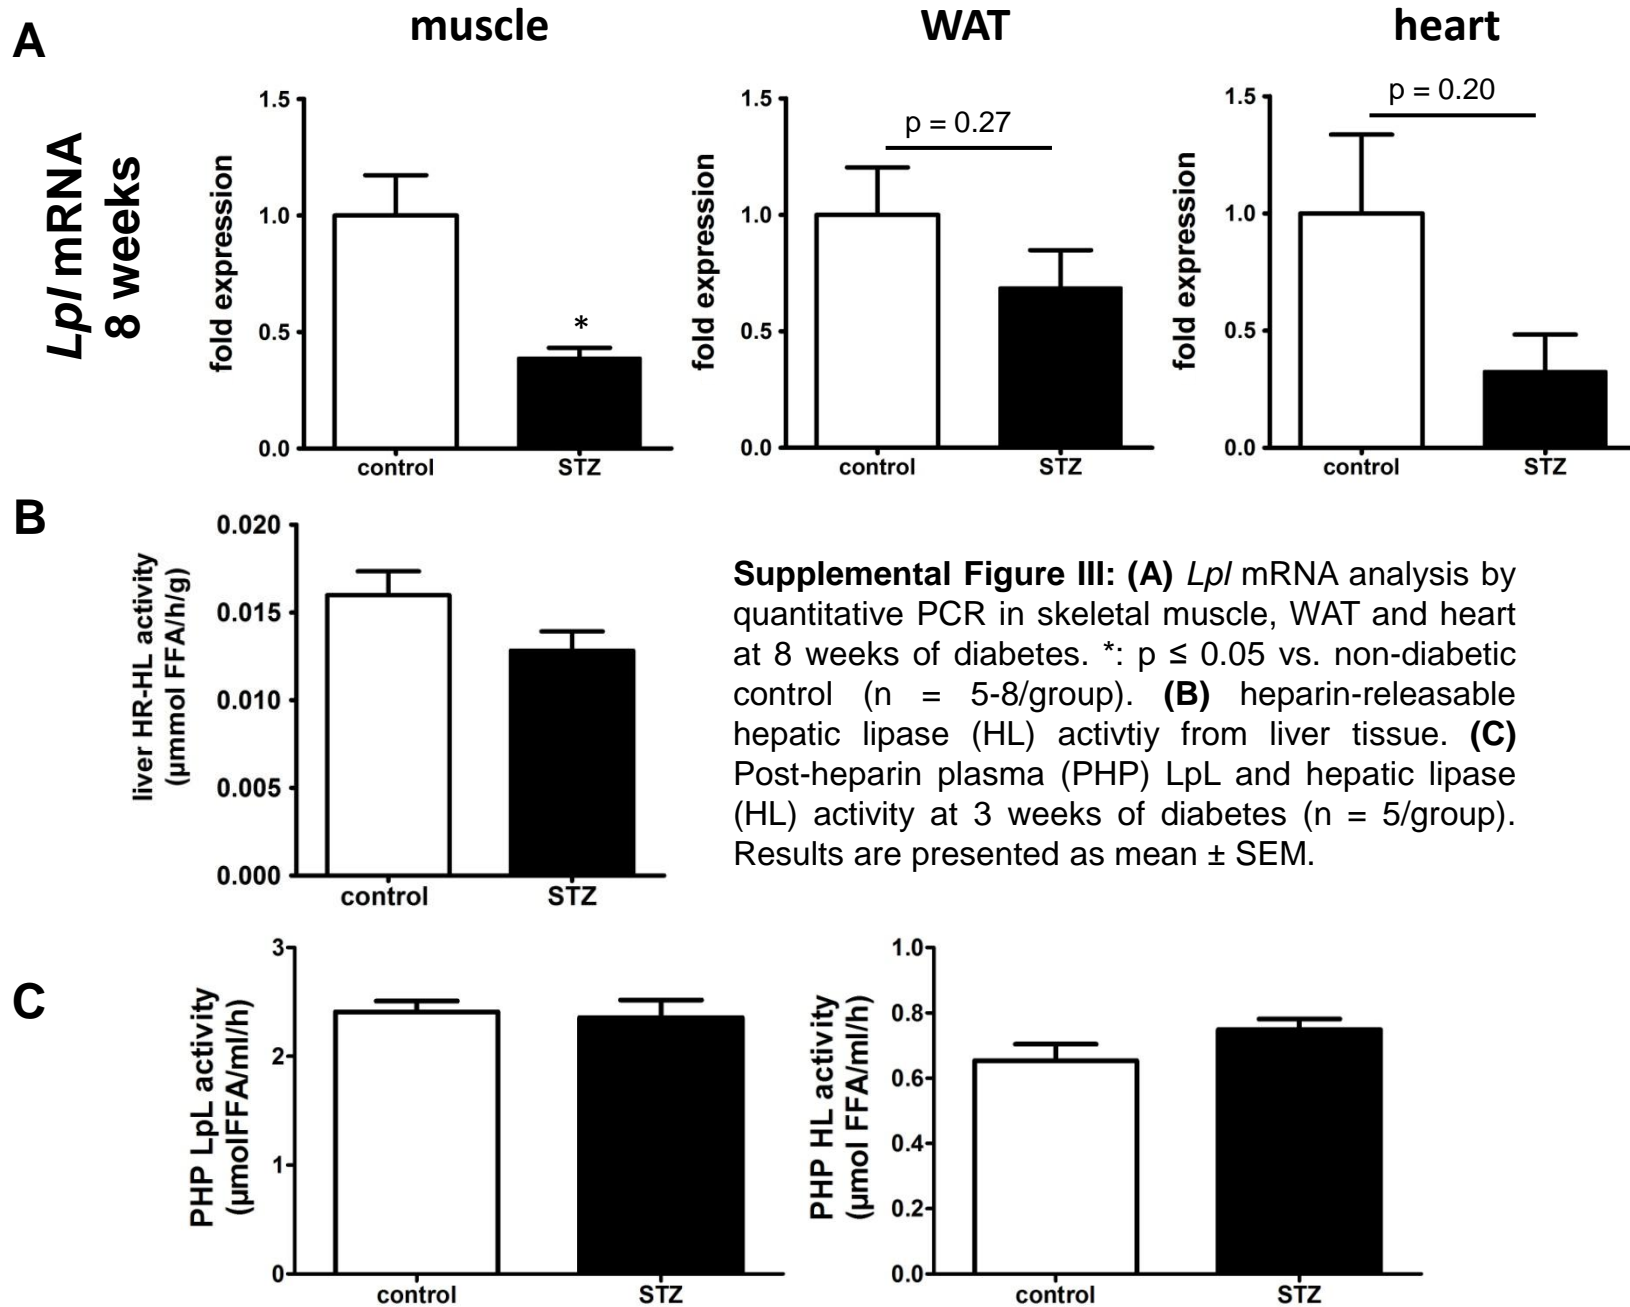

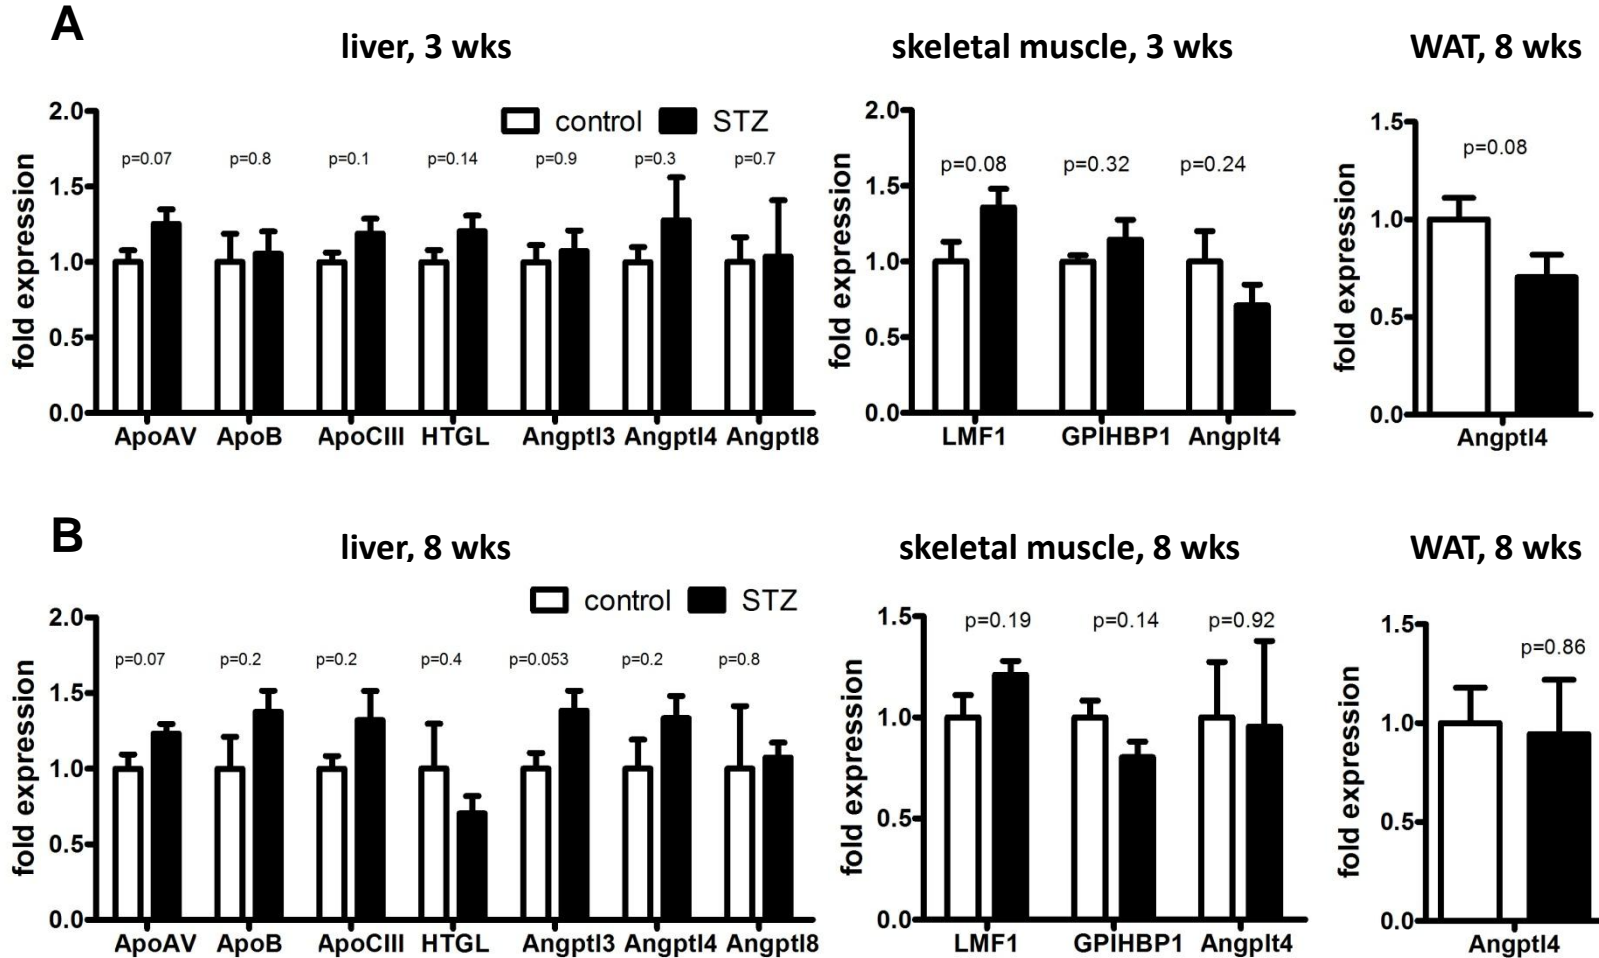

**Supplemental Figure IV:** Gene expression of apolipoproteins and regulators of lipolysis in liver, skeletal muscle and WAT after 3 (**A**) and 8 weeks (**B**) of STZ-diabetes using quantitative real-time PCR ( $n = 5/\text{group}$  for 3 weeks and 5-8/group for 8 weeks). Results are presented as mean  $\pm$  SEM.

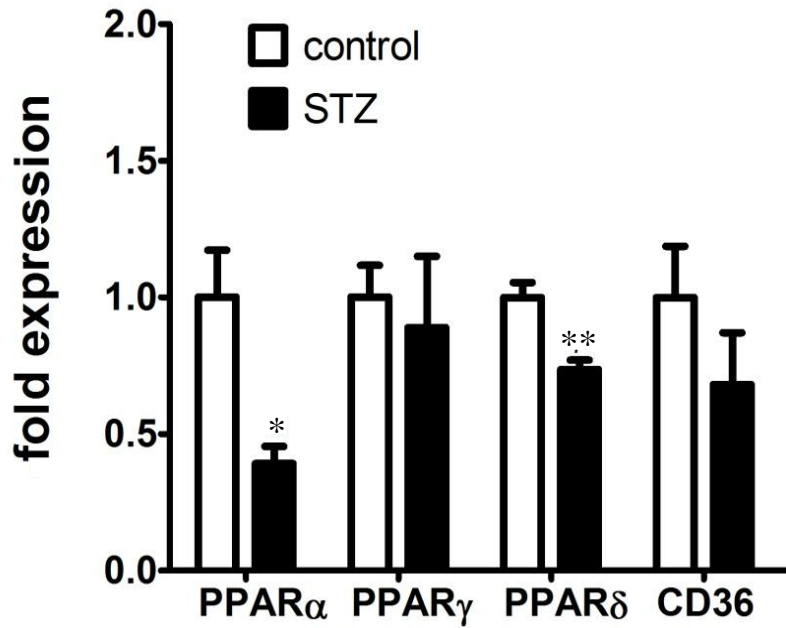

**Supplemental Figure V:** Gene expression of *PPAR $\alpha$* , *PPAR $\delta$* , *PPAR $\gamma$*  and *CD36* was assessed in the skeletal muscle after 8 weeks of STZ-diabetes using quantitative real-time PCR (n = 5-8/group). \*:  $p \leq 0.05$ , \*\*:  $p \leq 0.01$ . Results are presented as mean  $\pm$  SEM.

## Supplemental table I

**Supplemental Table I:** Primer sequences used for RT-PCR

| gene          | forward primer                  | reverse primer                  |
|---------------|---------------------------------|---------------------------------|
| acc1          | aac atc ccc acg cta aac ag      | agg tcc gga aag aga cca tt      |
| acc2          | tgg agtc cat ctt cct gtc c      | gga cgc cat aca gac aac ct      |
| angptl3       | aca tgt ggc tga gat tgc tg      | gct gga gca tca ttt tgg at      |
| angptl4       | gga aaa gat gca ccc ttc aa      | tgc tgg atc ttg ctg ttt tg      |
| angptl8       | gtg ctg caa gga aca ctg aa      | tcc aca ggg ctc tgt ctt ct      |
| apoA          | gag tcg agt gct gca cca ta      | acg tgt gag ttt gtg gga ca      |
| apob          | aag cac ctc cga aag tac gtg     | ctc cag ctc tac ctt aca gtt ga  |
| apocIII       | agc gtg cag gag tcc gat ata gc  | aga atc cca gaa gcc ggt gaa c   |
| cpt1 $\beta$  | tcg tca cct ctt ctg cct tt      | aca cac cat agc cgt cat ca      |
| dgat2         | ctgtcacctggctcaacaga            | tat cag cca gca gtc tgt gc      |
| elovl6        | aca acc tcc ggg cat agg ta      | cag agt gtg gtg gag tct gg      |
| fasn          | tac caa gcc aag cac att cg      | tgg ctt cgg cga tga ga          |
| gpihbp1       | ggg cac aag aag atg gtg at      | ctg gag cag ctc tgt gtc tg      |
| htgl          | gac tgg atc tcc ctg gca ta      | agg tga act ttg ctc cga ga      |
| lmf1          | ctc agc gta ccc gtg gtt at      | cgg tag tgg tat ggc gag at      |
| lpl           | atc aac tgg atg gag gag gag ttt | ttg gtc aga ctt cct gct acg c   |
| ppar $\alpha$ | tgc aaa ctt gga ctt gaa cg      | gatcagcatcccgtctttgt            |
| ppary         | gag tgt gac gac aag att tg      | ggtgggcccagaatggcatct           |
| ppar $\delta$ | tgg agc tcga tga cag tgac       | gta ctg gct gtc agg gtg gt      |
| scd1          | ctc ctg ctg atg tgc ttc atc c   | agt gta tcg caa gaa ggt gct aac |
| sglt-2        | att gtc tcg ggc tgg tatt g      | tta gag cag ccc acc tca gt      |
